# Supplementary material
Source: publisher figshare collection journal article supplement (https://asha.figshare.com/articles/dataset/_/13564745)
Supplement: Supplementary file 2 [file 1]

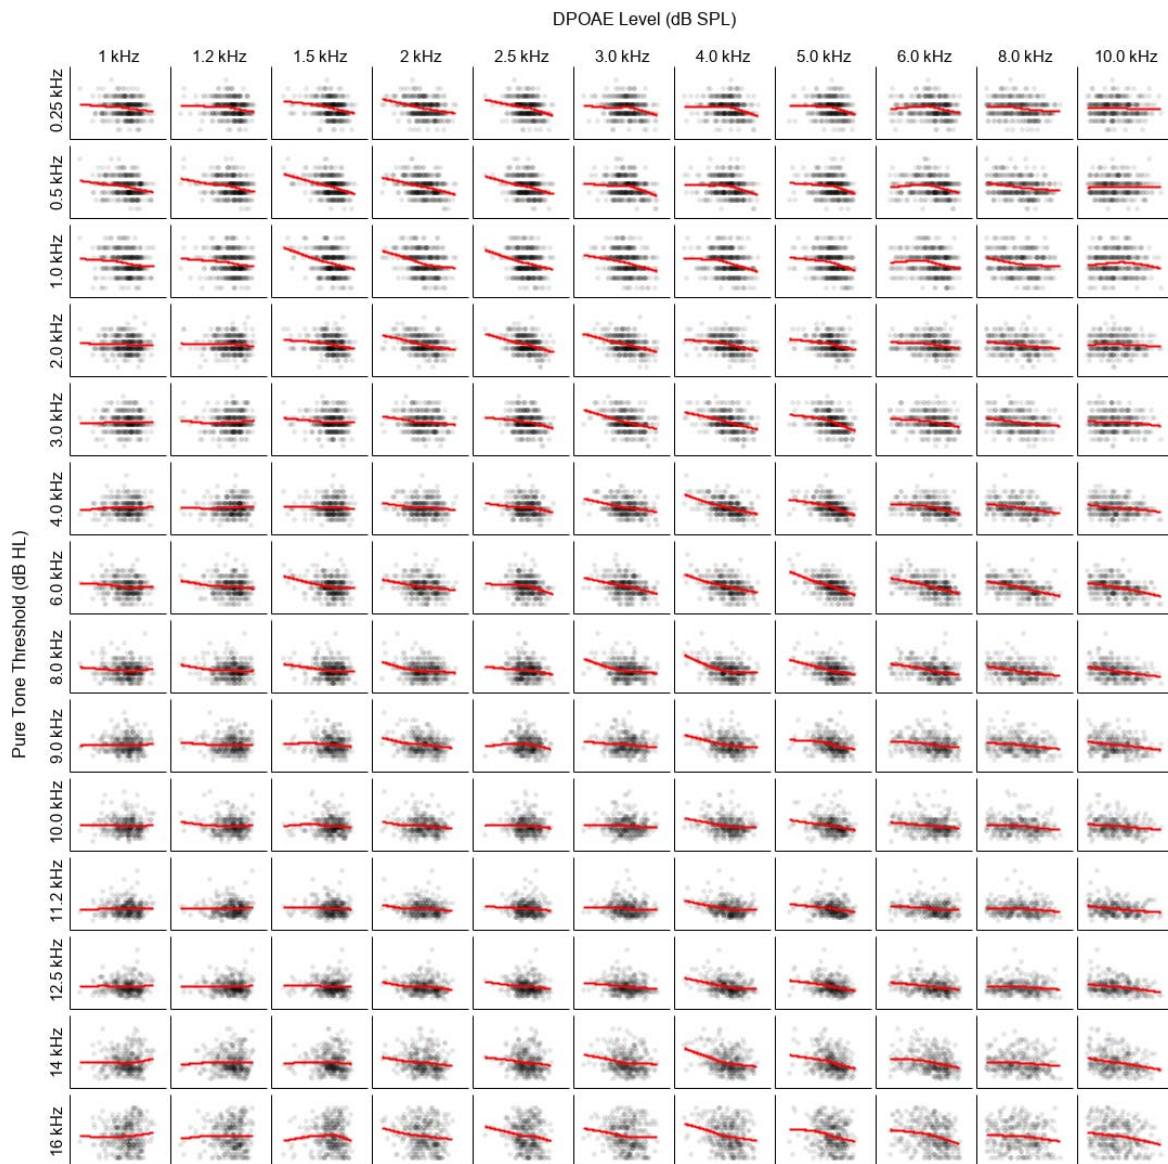

**Supplemental Material S2.** Relationship between pure tone thresholds and DPOAE levels across frequency. The strongest correlations between audiometric thresholds and DPOAE levels are not necessarily observed at corresponding frequencies. Black dots show observed DPOAE level and pure tone threshold data for individual ears. Pure tone thresholds are plotted with larger (poorer) thresholds at the top of each plot and smaller thresholds at the bottom. Lower DPOAE levels are shown on the left side of the plot and higher levels are on the right side. Red lines show LOESS smooth functions.
